# Supplementary material
Source: Research Square preprint supplement (doi:10.21203/rs.3.rs-9538771/v1)
Supplement: Supplementary file 1 [file c6f295b462439b011b215718.docx]

**Appendix 1.** Major Tree, shrubs, the crop grew and managed by local communities in the study site.

| **Botanical Name** | **Local name** | **kile** | **harawe** | **No of individuals species** |
| --- | --- | --- | --- | --- |
| Mangifera indica L. | Mango | √ | √ | 173 |
| Casimiroa edulus L. | Ambuka | √ | √ | 45 |
| Catha edulis (Vahl.) Forssk. ex Endl. | Chat | √ | √ | - |
| Moringa oleifera | Shifera | √ | √ | 37 |
| Carica papaya L. | Papaya | √ | √ | 112 |
| Cajanus cajan (L.) Mill. sp. | Atara looni | √ | √ | 45 |
| Grevillea robusta A. Cunn. ex. R. Br. | Grevillea | √ | √ | 22 |
| Pennisetum purpureum S. | Nyaata arbaa | √ | √ | 32 |
| Psidium guajava L. | Zeyitunaa | √ | √ | - |

**Appendix 2.** Comparison between agroforestry and monoculture.

| **Factor** | **Agroforestry** | **Monoculture** |
| --- | --- | --- |
| Carbon sequestration | High | Low |
| Income generation | Moderate-High | Moderate-High |
| Land use sustainability | High | Low |
| Fruit tree diversity | High | Low |
| Soil fertility improvement | High | Low |
| Microclimate improvement | High | Low |
| Livelihood improvement | High | Low |

**Appendix 3.** Major Tree, shrubs, the crop grew and managed by local communities in the study site.

| **practice of HH** | | |
| --- | --- | --- |
| **Agroforestry mean income/ year** | **Monoculture mean income/year** | |
| Mango and apple mango tree | 4210.3 | 0 |
| *Papaya* | 1459.84 | 39.23 |
| *Lemon* | 372.24 | 18 |
| *Zayituna* | 1056.92 | 0 |
| *Ambuka* | 937.06 | 16.83 |
| *Potato* | 1231.6 | 422.81 |
| *Tomato* | 1325.42 | 17.4646 |
| *Vegetables* | 744 | 9.42 |
| *Sorghum* | 63.96 | 1382.25 |
| Maize | 12.6 | 1166.31 |
| *Groundnut* | 82.2 | 1259.62 |
| Salita | 32.9 | |
